# Supplementary material for: Vector substrate design for grain boundary engineering: boosting oxygen evolution reaction performance in LaNiO 3
Source: Royal Society of Chemistry journal article supplement (doi:10.1039/d4mh01565g), 2024-12-13
Supplement: d4mh01565g1.pdf [file d4mh01565g1.pdf]

# Vector Substrate Design for Grain Boundary Engineering: Boosting Oxygen Evolution Reaction Performance in $\text{LaNiO}_3$

*Huan Liu,<sup>a</sup> Yue Han,<sup>a</sup> Jinrui Guo,<sup>b</sup> Wenqi Gao,<sup>b</sup> Jiaqing Wang,<sup>b</sup> Bin He,<sup>\*b</sup> Zhihong Wang,<sup>\*a</sup> and Weiming Lü<sup>\*ab</sup>*

<sup>a</sup> School of Physics, Harbin Institute of Technology, Harbin 150001, China.

<sup>b</sup> Spintronics Institute, School of Physics and Technology, University of Jinan, Jinan 250022, China.

\* Email: [sd\\_y\\_heb@ujn.edu.cn](mailto:sd_y_heb@ujn.edu.cn); [wangzhihong@hit.edu.cn](mailto:wangzhihong@hit.edu.cn); [weiminglv@hit.edu.cn](mailto:weiminglv@hit.edu.cn).

## Experimental Section

*Sample preparation:* Epitaxial multilayer thin films were fabricated using a PLD technique. SAO and STO layers were sequentially deposited on the STO substrate at a temperature of 700 °C. The growth oxygen pressure was set to  $5 \times 10^{-5}$  Torr for SAO and  $1 \times 10^{-1}$  Torr for STO. The as-grown sample was attached to PDMS and then immersed in deionized water to dissolve the SAO layer, obtaining a freestanding STO membrane that adhered to the PDMS. Then, the STO membrane was released from the PDMS by heating the as-sample at 100 °C for 10 minutes and transferred to another STO substrate with a different orientation. Then, the LNO layer was deposited on the modified substrate, with a temperature of 700 °C and a growth oxygen pressure of  $1 \times 10^{-1}$  Torr.

*Characterizations:* The crystal structure, surface morphology, and microstructure were characterized using XRD (Rigaku Smartlab), AFM (Asylum Research, MFP-3D Origin+), and TEM (JEM-2100Plus). XPS (PHI5000 VersaProbeIII) analyses were conducted using a non-monochromatized Al K $\alpha$  X-ray source.

*OER measurements:* The OER performance was assessed using a standard three-electrode system with a CHI760E electrochemical workstation in 1 mol L<sup>-1</sup> KOH solution. The carbon rod and Hg/HgO electrode served as the counter and reference electrodes, respectively. Additional experimental details can be found in the provided reference.<sup>1</sup> All potentials were converted to a reversible hydrogen electrode (RHE):  $E \text{ vs RHE} = E \text{ vs Hg/HgO} + 0.098 + 0.059 \times \text{pH}$ . All potentials mentioned in this study are versus RHE.

*Theoretical Calculations:* All DFT computations were performed using the Vienna Ab-initio Simulation Package (VASP). Exchange-correlation effects were treated with the Perdew-Burke-Ernzerhof (PBE) functional in the generalized gradient approximation (GGA) method. Core-

valence interactions were handled using the projected augmented wave (PAW) method. A plane wave energy cutoff of 400 eV was applied. Structural optimization was achieved with energy and force convergence criteria set at  $1.0 \times 10^{-4}$  eV and  $0.05 \text{ eV \AA}^{-1}$ , respectively. The Brillouin zone was sampled using a  $3 \times 3 \times 1$  K-point mesh. Dispersion interactions were modeled with Grimme's DFT-D3 approach.

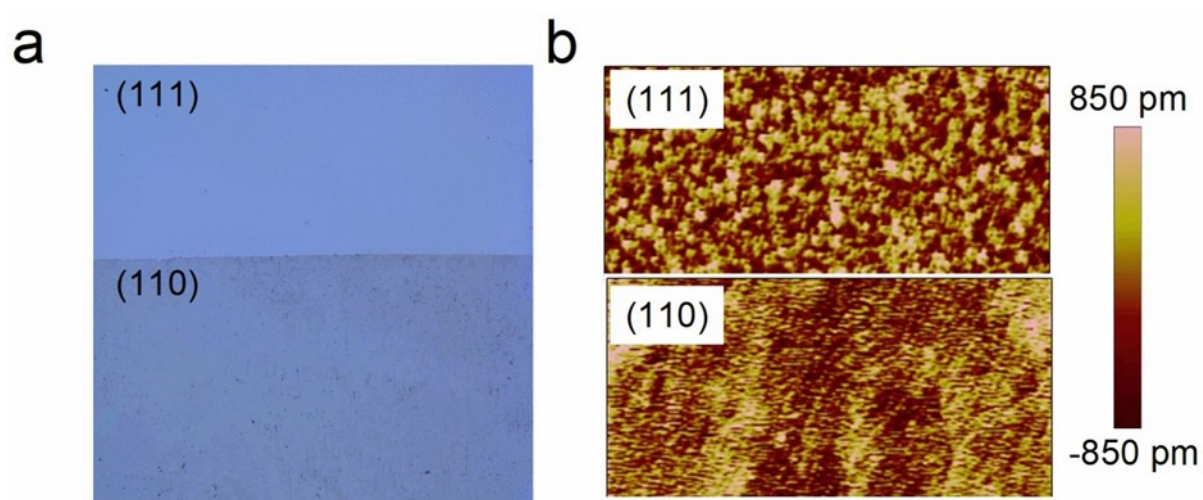

**Fig. S1** Optical and AFM images of LNO (110/111).

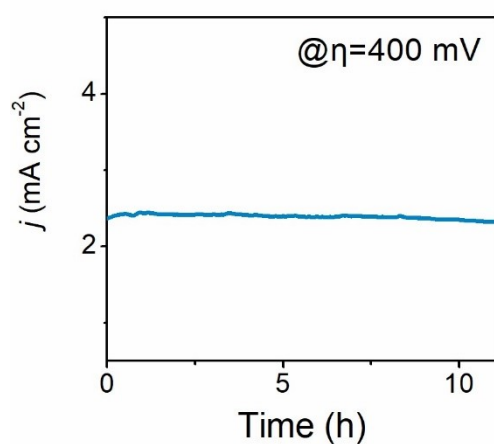

**Fig. S2.** Chronoamperometry curve at  $\eta = 400$  mV of the LNO (110/111).

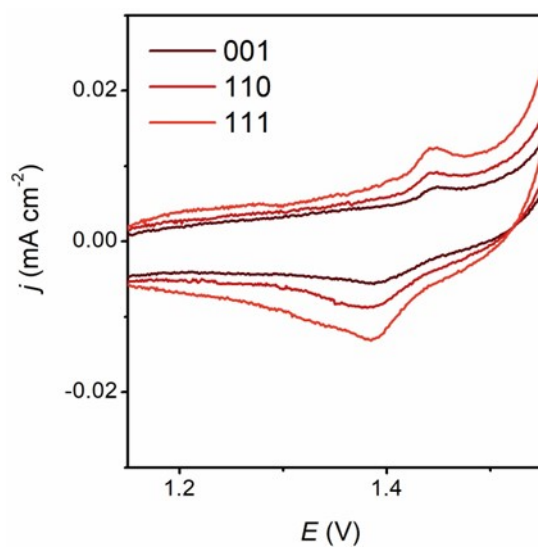

**Fig. S3** CV curves of LNO (001), (110), and (111).

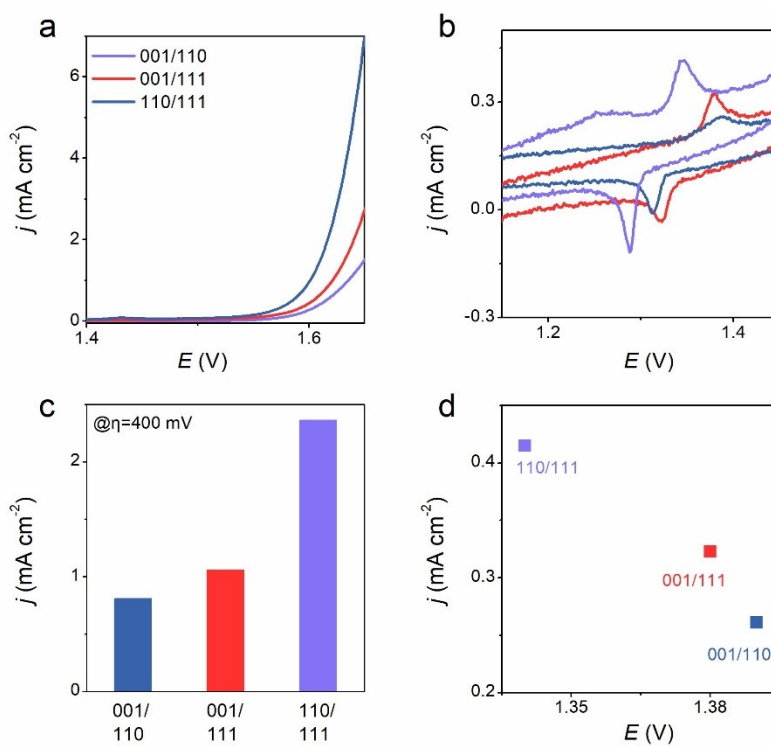

**Fig. S4** (a) LSV and (b) CV curves of LNO (001/110), (001/111), and (110/111) grown on LAO substrates. The summarized (c) current density at  $\eta=400$  mV and (d) oxidation peak positions.

## References

1 H. Liu, B. He, Y. Han, J. Guo, J. Wang, H. Fang, J. Wang, W. Gao, Y. Zhang, Z. Wang, Z.

Wang, S. Yan and W. Lü, *Appl. Catal. B-Environ. Energy*, 2024, **359**, 124495.
